# Supplementary material for: CuII-mediated DNA base pairing of a triazole-4-carboxylate nucleoside prepared by click chemistry
Source: Royal Society of Chemistry journal article supplement (doi:10.1039/d2cc06205d), 2022-12-16

Electronic Supplementary Information

**Cu<sup>II</sup>-mediated DNA base pairing of triazole-4-carboxylate nucleoside prepared by click chemistry**

Lingyun Hu, Yusuke Takezawa\* and Mitsuhiko Shionoya\*

*Department of Chemistry, Graduate School of Science, The University of Tokyo, 7-3-1 Hongo, Bunkyo-ku, Tokyo 113-0033, Japan. E-mail: takezawa@chem.s.u-tokyo.ac.jp; shionoya@chem.s.u-tokyo.ac.jp*

**Contents**

|                                   |                |
|-----------------------------------|----------------|
| <b>1. Experimental Procedures</b> | <b>.....S2</b> |
| <b>2. Supplementary Figures</b>   | <b>.....S5</b> |
| <b>3. Supplementary Tables</b>    | <b>.....S6</b> |
| <b>4. NMR spectra</b>             | <b>.....S7</b> |

# 1. Experimental procedures

**General.** All reagents used for the organic synthesis were purchased from FUJIFILM Wako Pure Chemical Industries, Tokyo Chemical Industry (TCI), and Aldrich, and were used without further purification. Unless otherwise noted, all reactions were carried out under argon atmosphere with commercial dehydrated solvents (FUJIFILM Wako Pure Chemical Industries). Silica gel column chromatography was carried out using Merck Silica Gel 60 (230–400 mesh), and reverse-phase column chromatography using Wakogel 50C18 (38–63  $\mu\text{m}$ ). All NMR spectra were measured on a Bruker AVANCE 500 spectrometer (500 MHz for  $^1\text{H}$ , 202 MHz for  $^{31}\text{P}$ , and 126 MHz for  $^{13}\text{C}$ ). The spectra were referenced to tetramethylsilane (TMS) in  $\text{CDCl}_3$  ( $\delta$  0 ppm) or to the residual solvent signals in  $\text{CD}_3\text{OD}$  ( $\delta$  3.31 ppm). Electrospray ionization-time-of-flight (ESI-TOF) mass spectra were recorded on a Waters LCT Premier XE. Metal sources were purchased from FUJIFILM Wako Pure Chemical Industries ( $\text{MnCl}_2 \cdot 4\text{H}_2\text{O}$  (99%),  $\text{FeCl}_2 \cdot 4\text{H}_2\text{O}$  (99.0–102.0%),  $\text{CoCl}_2$  (99.0–102.0%),  $\text{NiCl}_2 \cdot 6\text{H}_2\text{O}$  (99.9%),  $\text{CuSO}_4 \cdot 5\text{H}_2\text{O}$  (99.5% purity),  $\text{AgNO}_3$  (99.8%)) and Soekawa Chemical Co. ( $\text{ZnSO}_4 \cdot 7\text{H}_2\text{O}$  (99.9%)).

**Compound 3.** 2-Deoxy-3,5-di-*O*-(*p*-toluoyl)- $\beta$ -D-erythro-pentafuranosyl azide (**1**) (1.04 g, 2.6 mmol) was dissolved in  $\text{CH}_2\text{Cl}_2$  (26 mL), and acetic acid (181  $\mu\text{L}$ , 1.2 eq.), diisopropylethylamine (2.3 mL, 5.0 eq.) and ethyl propiolate (321  $\mu\text{L}$ , 1.2 eq.) were sequentially added. After  $\text{CuI}$  powder (1.0 g, 2.0 eq.) was added, the suspension was vigorously stirred at room temperature for 20 min. Then, the reaction mixture was diluted with  $\text{CH}_2\text{Cl}_2$  (50 mL) and washed with saturated EDTA aqueous solution (25 mL) for several times until the aqueous layer became colorless. The organic phase was further washed with water (50 mL) and was dried over  $\text{Na}_2\text{SO}_4$  before evaporation. The crude product was purified by silica gel column chromatography (*n*-hexane  $\rightarrow$  *n*-hexane:AcOEt = 2:1) to afford compound **2** as a yellow-brown solid (1.16 g, 2.4 mmol). Although the color indicated the existence of impurities, the obtained compound was used for the next reaction without further purification.  $^1\text{H}$  NMR (500 MHz,  $\text{CDCl}_3$ ):  $\delta$  8.28 (s, 1H), 7.94 (d,  $J = 8.2$  Hz, 2H), 7.82 (d,  $J = 8.2$  Hz, 2H), 7.28 (d,  $J = 8.1$  Hz, 2H), 7.22 (d,  $J = 8.1$  Hz, 2H), 6.51 (dd,  $J = 6.3, 6.3$  Hz, 1H), 5.76–5.74 (m, 1H), 4.69 (ddd,  $J = 3.5, 3.5, 3.5$  Hz, 1H), 4.65–4.56 (m, 2H), 4.38 (q,  $J = 7.1$  Hz, 2H), 3.15 (ddd,  $J = 14.3, 6.6, 6.3$  Hz, 1H), 2.44 (ddd,  $J = 14.3, 6.3, 3.3$  Hz, 1H), 2.44 (s, 3H), 2.40 (s, 3H), 1.36 (t,  $J = 7.1$  Hz, 3H). The obtained compound **2** (1.16 g, 2.4 mmol) was dissolved in a mixture of EtOH (50 mL) and  $\text{CH}_2\text{Cl}_2$  (20 mL). After the addition of  $\text{K}_2\text{CO}_3$  (0.81 g, 5.9 mmol), the mixture was stirred at 45  $^\circ\text{C}$  for 4 h. The reaction mixture was slowly decanted to remove excess  $\text{K}_2\text{CO}_3$ , and the remaining solution was evaporated to dryness. The crude product was purified by silica gel

column chromatography ( $\text{CHCl}_3 \rightarrow \text{CHCl}_3:\text{MeOH} = 10:1$ ) to afford compound **3** as a colorless solid (0.58 g, 2.3 mmol, 86% in 2 steps).  $^1\text{H}$  NMR (500 MHz,  $\text{CD}_3\text{OD}$ ):  $\delta$  8.78 (s, 1H), 6.48 (dd,  $J = 5.9, 5.9$  Hz, 1H), 4.57 (ddd,  $J = 5.1, 5.1, 5.1$  Hz, 1H), 4.40 (q,  $J = 7.1$  Hz, 2H), 4.08–4.05 (m, 1H), 3.76 (dd,  $J = 12.0, 3.8$  Hz, 1H), 3.66 (dd,  $J = 12.0, 4.8$  Hz, 1H), 2.82–2.78 (m, 1H), 2.60–2.56 (m, 1H), 1.40 (t,  $J = 7.1$  Hz, 3H).  $^{13}\text{C}$  NMR (126 MHz,  $\text{CD}_3\text{OD}$ ):  $\delta$  160.5, 139.5, 126.9, 89.3, 88.5, 70.6, 61.6, 60.9, 40.5, 13.2. HRMS (ESI-TOF)  $m/z$ :  $[\text{M} + \text{H}]^+$  calcd for  $\text{C}_{10}\text{H}_{15}\text{N}_3\text{O}_5$ : 258.1090, found: 258.1070.

**Compound 4.** Compound **3** (0.26 g, 1.0 mmol) and DMAP (1.2 mg, 0.01 eq.) were dissolved in dry pyridine (20 mL). After the addition of 4,4'-dimethoxytrityl chloride (0.41 g, 1.2 mmol), the mixture was stirred at room temperature for 1 h. The reaction mixture was diluted with  $\text{CH}_2\text{Cl}_2$  (50 mL), and then washed with saturated  $\text{NaHCO}_3$  aqueous solution (50 mL) and  $\text{H}_2\text{O}$  (50 mL). The organic layer was dried over  $\text{Na}_2\text{SO}_4$  before being evaporated to dryness. The crude product was purified by silica gel column chromatography ( $n$ -hexane:AcOEt:MeOH = 5:15:2 with 1% of triethylamine) to afford compound **4** as colorless foam (0.50 g, 0.90 mmol, 89%).  $^1\text{H}$  NMR (500 MHz,  $\text{CDCl}_3$ ):  $\delta$  8.27 (s, 1H), 7.37–7.20 (m, 9H), 6.82 (dd,  $J = 8.9, 1.2$  Hz, 4H), 6.35 (dd,  $J = 6.5, 4.4$  Hz, 1H), 4.66–4.60 (m, 1H), 4.35 (q,  $J = 7.1$  Hz, 2H), 4.15–4.12 (m, 1H), 3.80 (s, 6H), 3.37 (dd,  $J = 10.4, 4.6$  Hz, 1H), 3.29 (dd,  $J = 10.4, 4.8$  Hz, 1H), 2.96 (ddd,  $J = 13.6, 6.3, 4.4$  Hz, 1H), 2.62 (ddd,  $J = 13.3, 6.5, 6.5$  Hz, 1H), 1.34 (t,  $J = 7.1$  Hz, 3H).  $^{13}\text{C}$  NMR (126 MHz,  $\text{CDCl}_3$ ):  $\delta$  160.5, 158.5, 144.4, 140.1, 135.6, 135.5, 129.9, 128.0, 127.9, 126.9, 126.3, 113.2, 89.0, 86.6, 71.5, 63.2, 61.2, 55.2, 40.8, 14.2. HRMS (ESI-TOF)  $m/z$ :  $[\text{M} + \text{H}]^+$  calcd for  $\text{C}_{31}\text{H}_{33}\text{N}_3\text{O}_7$ : 560.2397, found: 560.2387.

**Compound 5.** To a solution of compound **4** (0.17 g, 0.30 mmol) in  $\text{CH}_2\text{Cl}_2$  (3.0 mL), diisopropylethylamine (198  $\mu\text{L}$ , 4.0 eq) and 2-cyanoethyl  $N,N$ -diisopropylchlorophosphoramidite (100  $\mu\text{L}$ , 1.5 eq) were added slowly. After stirred at room temperature for 30 min, the reaction mixture was diluted with AcOEt (25 mL) and washed with saturated  $\text{Na}_2\text{CO}_3$  aqueous solution (25 mL  $\times$  2) and brine (25 mL). The organic layer was dried over anhydrous  $\text{Na}_2\text{SO}_4$  and then evaporated to dryness. The residue was purified by silica gel column chromatography ( $n$ -hexane:AcOEt = 1:1 with 1% triethylamine) to afford compound **5** as colorless foam (184 mg, 0.16 mmol, 82%, a diastereomeric mixture).  $^1\text{H}$  NMR and  $^{31}\text{P}$  NMR spectra indicated the existence of two diastereomers. The compound **5** was immediately used for the DNA synthesis.  $^1\text{H}$  NMR (500 MHz,  $\text{CDCl}_3$ ):  $\delta$  8.31 (s, 0.5H), 8.28 (s, 0.5H), 7.37–7.11 (m, 9H), 6.82–6.78 (m, 4H), 6.39–6.34 (m, 1H), 4.74–4.65 (m, 1H), 4.39–4.28 (m, 3H), 3.88–3.52 (m, 10H), 3.34–3.24 (m, 2H), 2.98–2.88 (m, 1H), 2.77–2.65 (m, 1H), 2.62 (t,  $J = 6.3$ , 1H),

2.46 (t,  $J = 6.5$ , 1H), 1.34–1.29 (m, 3H) 1.20–1.08 (m, 12H).  $^{31}\text{P}$  NMR (202 MHz,  $\text{CDCl}_3$ , 300 K):  $\delta$  149.34, 149.04. HRMS (ESI-TOF)  $m/z$ :  $[\text{M} + \text{Na}]^+$  calcd for  $\text{C}_{40}\text{H}_{49}\text{N}_5\text{O}_8\text{PNa}$ : 782.3295, found: 782.3260.

**DNA synthesis.** DNA strands containing **Taz<sup>C</sup>** were synthesized on an automated DNA synthesizer (NTS M-4-MX DNA/RNA synthesizer) according to the standard procedure. The **Taz<sup>C</sup>** phosphoramidite (**5**) was dissolved in dry MeCN to prepare a 0.08 M solution. DNA synthesis was carried out on a 1- $\mu\text{mol}$  scale in a DMTr-on mode with ultramild deprotection phosphoramidites and reagents (Glen Research). The coupling time for the **Taz<sup>C</sup>** phosphoramidite was extended to 15 min. The oligonucleotides were detached from the solid supports by 2-hour incubation with a 0.3 M NaOH aqueous solution at room temperature. The supernatants were further incubated at 37 °C for 22 h. The obtained products were detritylated and purified using Glen-pak cartridges (Glen research) according to the manufacturer's protocol. Further purification by reverse-phase HPLC (Waters XBridge Oligonucleotide BEH C18 column, buffers: A = MeCN, B = 0.1 M TEAA (pH 7.0) + 2% MeCN, 60 °C) afforded the desired DNA strands, which were identified by ESI-TOF mass spectrometry.

**TTaz<sup>C</sup>T.** 5'-TTaz<sup>C</sup>T-3'. HPLC retention time: 14.4 min (gradient: 2%A (0 min), 4%A (40 min)). ESI MS:  $m/z$  calcd for  $[\text{C}_{28}\text{H}_{37}\text{N}_7\text{O}_{19}\text{P}_2 - \text{H}]^-$ : 836.15; found: 836.06.

**ODN1.** 5'-CAC ATT ATaz<sup>C</sup>T GTT GTA-3'. HPLC retention time: 15.6 min (gradient: 5%A (0 min), 6.5%A (30 min)). ESI MS:  $m/z$  calcd for  $[\text{C}_{146}\text{H}_{185}\text{N}_{51}\text{O}_{91}\text{P}_{14} - 3\text{H}]^{3-}$ : 1513.58; found: 1513.59.

**ODN2.** 5'-TAC AAC ATaz<sup>C</sup>T AAT GTG-3'. HPLC retention time: 15.0 min (gradient: 5%A (0 min), 6.5%A (30 min)). ESI MS:  $m/z$  calcd for  $[\text{C}_{146}\text{H}_{183}\text{N}_{57}\text{O}_{87}\text{P}_{14} - 3\text{H}]^{3-}$ : 1519.26; found: 1519.31.

**Concentration determination of DNA strands.** The concentration of DNA strands was determined based on the UV absorbance at 260 nm. The molar extinction coefficients ( $\epsilon_{260}$ ) of the DNA strands were calculated by the nearest neighbor method. For the calculation of the  $\epsilon_{260}$  values of **Taz<sup>C</sup>**-containing DNA strands, the fully deprotected **Taz<sup>C</sup>** nucleoside was prepared by incubating compound **2** (50 mg, 0.2 mmol) with equimolar amount of NaOH (0.4 M NaOH aqueous solution, 0.5 mL) at room temperature for 2 h. Subsequent reverse-phase column chromatography (eluent:  $\text{H}_2\text{O}$ ) afforded fully deprotected **Taz<sup>C</sup>** nucleoside (50 mg as a sodium salt, over 100%), which was identified by  $^1\text{H}$  NMR.  $^1\text{H}$  NMR (500 MHz,  $\text{CD}_3\text{OD}$ ):  $\delta$  8.33 (s, 1H), 6.42 (dd,  $J = 6.0, 6.0$  Hz, 1H), 4.55 (m, 1H), 4.04 (m, 1H), 3.73 (dd,  $J = 12.0, 4.1$  Hz, 1H),

3.64 (dd,  $J = 12.0, 5.2$  Hz, 1H), 2.79 (ddd,  $J = 13.6, 6.0, 5.8$  Hz, 1H), 2.53 (ddd,  $J = 13.6, 6.6, 6.0$  Hz, 1H). The UV spectrum of the **Taz<sup>C</sup>** nucleoside was measured on Thermo Scientific NanoDrop 2000 spectrophotometer with a path length of 0.1 cm (Fig. S3). The spectrum showed that **Taz<sup>C</sup>** has no absorption at 260 nm. Therefore, the  $\epsilon_{260}$  values of the **Taz<sup>C</sup>** nucleosides were deemed to be zero to calculate the  $\epsilon_{260}$  values of **Taz<sup>C</sup>**-containing DNA strands.

**Duplex melting analysis.** All samples were prepared by combining the DNA strands (2.0  $\mu$ M each) in a 10 mM HEPES buffer (pH 7.0) solution containing 100 mM NaCl or 100 mM NaNO<sub>3</sub> (for Ag<sup>I</sup>). After the addition of metal ions, the samples were annealed from 60 °C to 4 °C at the rate of 1.0 °C/min. Absorbance at 260 nm ( $A_{260}$ ) was recorded on UV-1700, UV-1800 and UV-1900 spectrophotometers (Shimadzu) equipped with a TMSPC-8 temperature controller. The temperature was raised from 4 °C to 60 °C at the rate of 0.2 °C/min. The melting curves were depicted after normalization as follows:

$$\text{Normalized } A_{260} = \{A_{260}(t \text{ } ^\circ\text{C}) - A_{260}(4 \text{ } ^\circ\text{C})\} / \{A_{260}(60 \text{ } ^\circ\text{C}) - A_{260}(4 \text{ } ^\circ\text{C})\} \times 100.$$

The melting temperature ( $T_m$ ) was determined as an inflection point of a melting curve using a  $T_m$  analysis software LabSolutions (Shimadzu) with a 17-point adaptive smoothing program. Average  $T_m$  values of at least three independent runs are shown.

**Mass spectrometry.** For characterization of single DNA strands, 20  $\mu$ M samples were used for the measurements. For the analysis of the duplex with Cu<sup>II</sup> ions (**ODN1·ODN2·Cu<sup>II</sup>**), each DNA strand (100  $\mu$ M) and Cu<sup>II</sup> (100  $\mu$ M) were mixed in a 20 mM NH<sub>4</sub>OAc buffer (pH 7.0) and annealed prior to the measurements (60 °C  $\rightarrow$  4 °C, 1.0 °C/min). ESI-TOF mass spectra were recorded in the negative mode.

## 2. Supplementary figures

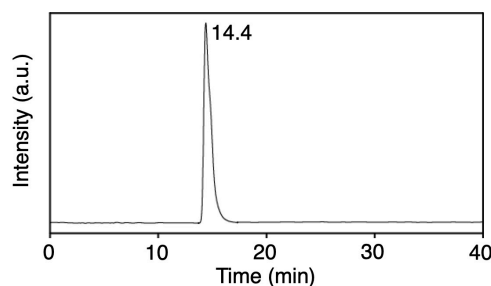

**Fig. S1.** HPLC analysis of 5'-TTaz<sup>CT</sup>-3' after deprotection using NaOH aqueous solution. Waters XBridge Oligonucleotide BEH C18 column, flow rate: 1.0 mL/min, temperature: 60 °C, monitored at 260 nm. Gradient: 0 to 40 min, 2% A to 4% A (solvent A = MeCN, solvent B = 0.1 M TEAA buffer (pH 7.0) + 2% MeCN).

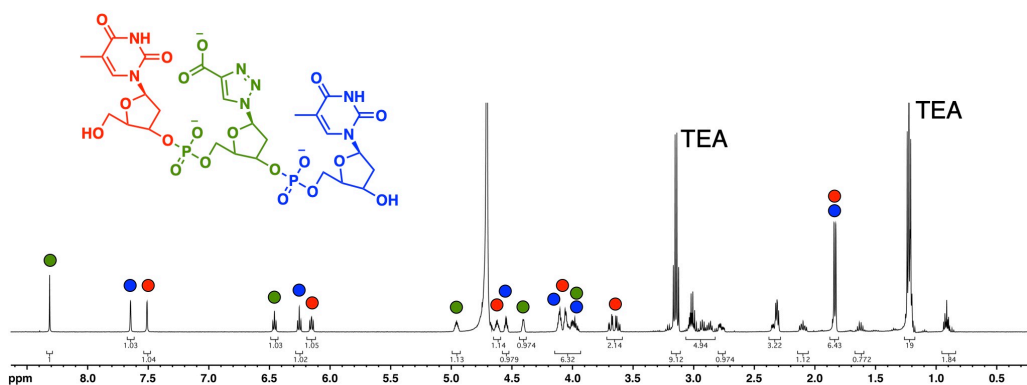

**Fig. S2.**  $^1\text{H}$  NMR spectrum of 5'-TTaz<sup>C</sup>T-3' after HPLC purification (500 MHz, 300 K, D<sub>2</sub>O). Protons belonging to different nucleotides are labeled with the corresponding colors.

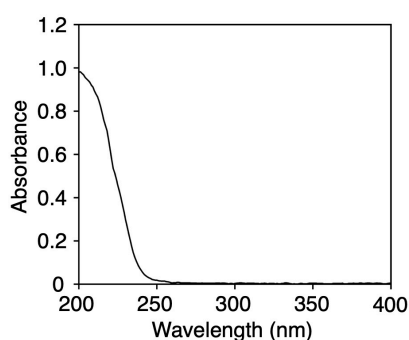

**Fig. S3.** UV spectrum of Taz<sup>C</sup> nucleoside. [nucleoside] = ca. 1.0 mM in 10 mM HEPES buffer (pH 7.0).  $l = 0.1$  cm, rt. Note that there is no absorption at 260 nm.

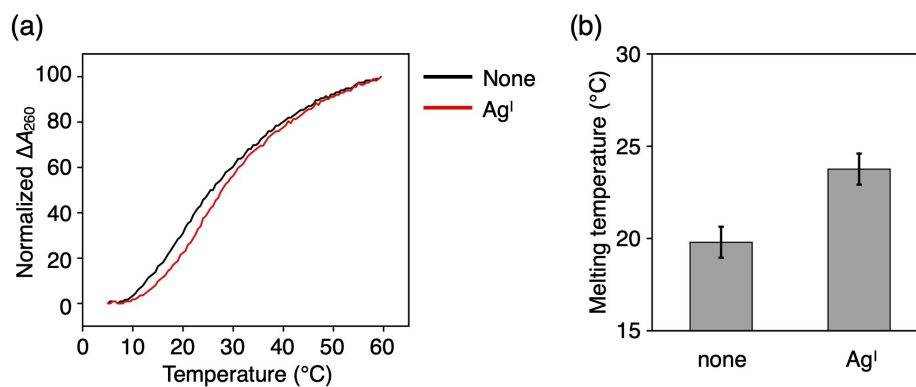

**Fig. S4.** (a) Melting curves of a DNA duplex containing a Taz<sup>C</sup>-Taz<sup>C</sup> base pair (ODN1·ODN2) in the presence of Ag<sup>I</sup> ions. [duplex] = 2.0 μM, [Ag<sup>I</sup>]/[duplex] = 0 or 1.0 in 10 mM HEPES buffer (pH 7.0), 100 mM NaNO<sub>3</sub>, 0.2 °C/min. (b) Melting temperatures.  $N = 3$ . The error bars represent the standard errors.

### 3. Supplementary tables

**Table S1.** Melting temperatures of duplexes **ODN1·ODN2** in the presence of 1 equiv. of transition metal ions.<sup>[a]</sup>

| Metals                         | 1·2                  |                                   |
|--------------------------------|----------------------|-----------------------------------|
|                                | $T_m/^\circ\text{C}$ | $\Delta T_m/^\circ\text{C}^{[b]}$ |
| None                           | $20.4 \pm 0.9$       | –                                 |
| Mn <sup>II</sup>               | $20.4 \pm 0.5$       | $\pm 0$                           |
| Fe <sup>II</sup>               | $21.8 \pm 1.0$       | +1.4                              |
| Co <sup>II</sup>               | $21.8 \pm 0.3$       | +1.4                              |
| Ni <sup>II</sup>               | $22.0 \pm 0.9$       | +1.6                              |
| Cu <sup>II</sup>               | $28.1 \pm 0.8$       | +7.7                              |
| Zn <sup>II</sup>               | $21.4 \pm 1.0$       | +1.0                              |
| Ag <sup>I</sup> <sup>[c]</sup> | $23.8 \pm 0.8$       | +4.0 <sup>[d]</sup>               |

[a] [duplex] = 2.0  $\mu\text{M}$ , [metal ion] = 2.0  $\mu\text{M}$  in a 10 mM HEPES buffer (pH 7.0), 100 mM NaCl.  $N = 4$ . The standard errors are shown. [b]  $\Delta T_m$  represents the temperature difference from the  $T_m$  value of the metal-free duplex. [c] [duplex] = 2.0  $\mu\text{M}$ , [Ag<sup>I</sup> ion] = 2.0  $\mu\text{M}$  in a 10 mM HEPES buffer (pH 7.0), 100 mM NaNO<sub>3</sub>.  $N = 3$ . [d] The  $T_m$  of the metal-free duplex was  $19.8 \pm 0.8$   $^\circ\text{C}$  under the same conditions.

### 4. NMR spectra

#### Compound 2

<sup>1</sup>H NMR (500 MHz, CDCl<sub>3</sub>, 300 K).

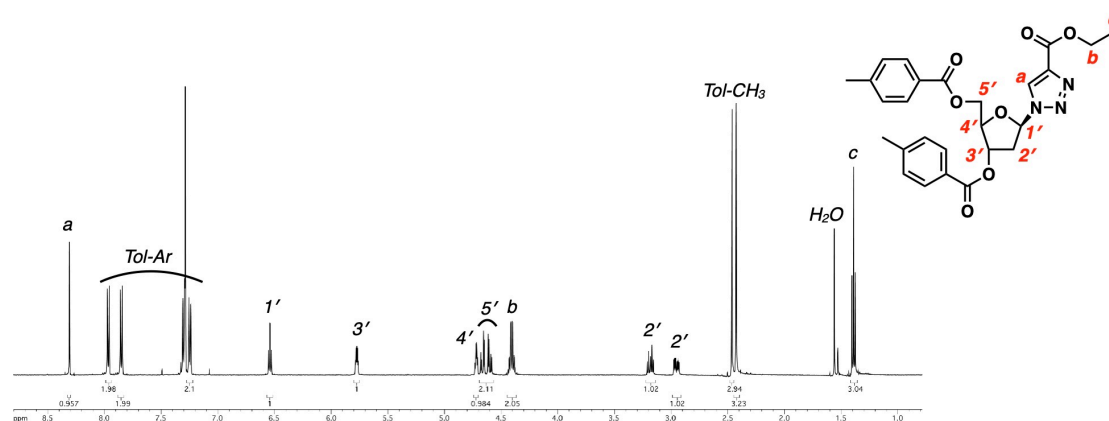

#### Compound 3

<sup>1</sup>H NMR (500 MHz, CD<sub>3</sub>OD, 300 K).

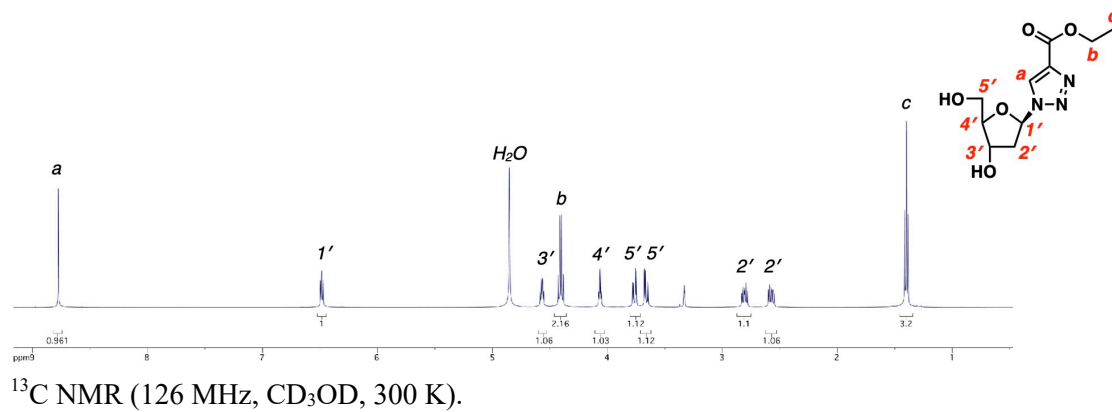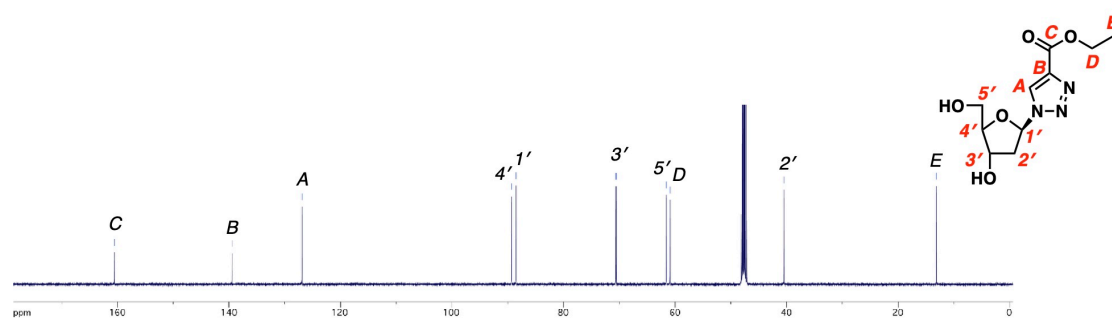

### Compound 4

$^1\text{H}$  NMR (500 MHz,  $\text{CDCl}_3$ , 300 K).

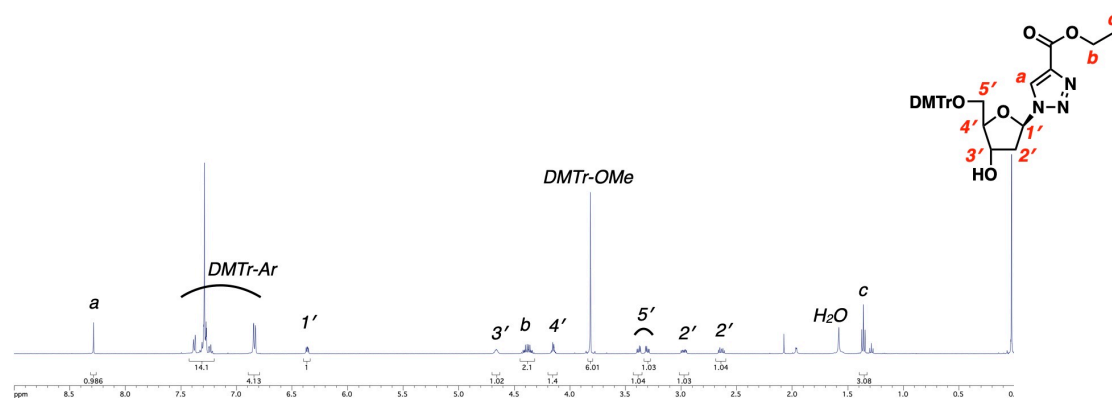

$^{13}\text{C}$  NMR (126 MHz,  $\text{CDCl}_3$ , 300 K).

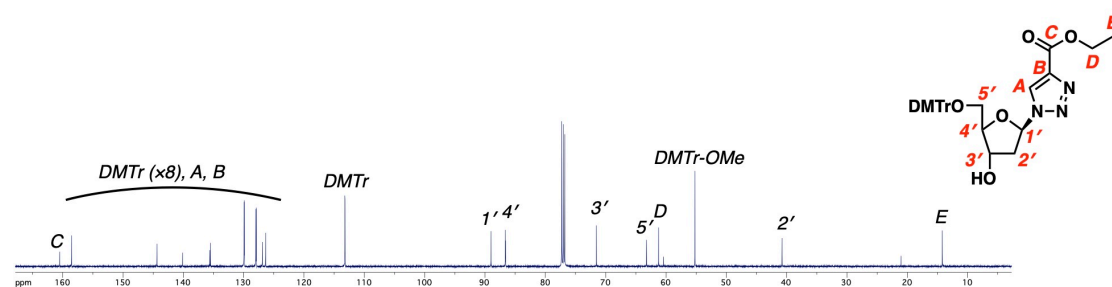



## Compound 5

$^1\text{H}$  NMR (500 MHz,  $\text{CDCl}_3$ , 300 K).

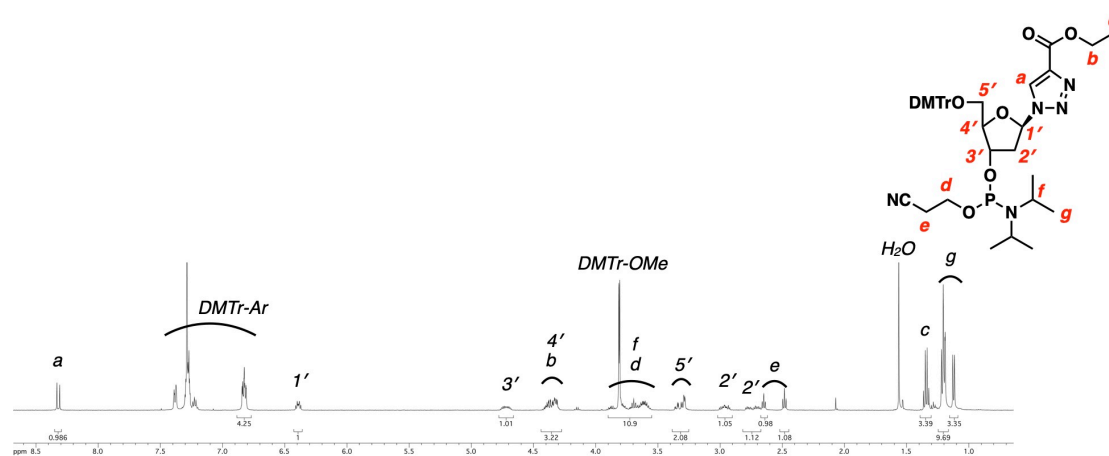

$^{31}\text{P}$  NMR (202 MHz,  $\text{CDCl}_3$ , 300 K).

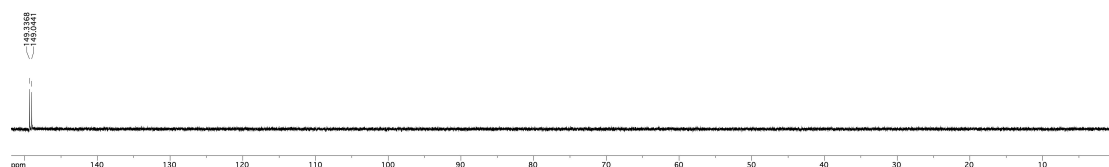

Supplement: d2cc06205d1.pdf [file d2cc06205d1.pdf]
